# Supplementary material for: Prospective Study to Assess Progression of Renal Markers after Interruption of Tenofovir due to Nephrotoxicity
Source: Hindawi journal article supplement (doi:10.1155/2016/4380845), 2016-01-01
Supplement: f1 [file 4380845.f1.doc]

Supplementary Table. Baseline Characteristics of the Subjects.

|  | **N=59** |
| --- | --- |
| **Gender (male),** n (%) | 41 (69.5%) |
| **Hepatitis B or C coinfection,** n (%) | 19 (32.2%) |
| **Age**,years | 53 (44;58) |
| **Time since HIV diagnosis**,months | 166 (98;255) |
| **CD4+ T-cell count at initiation of TDF**,n (%) | 28.5 (23,4;35.3) |
| **CD4+ T-cell count at initiation of TDF**,cells/µL | 549.5 (334.8;929.5) |
| **CD4+ T-cell count at discontinuation of TDF**,cells/µL | 567 (346;948) |
|  |  |
| **CD4+ T-cell % at discontinuation of TDF**,cells/µL | 29 (24;35) |
| **Nadir CD4+ T-cell count**,cells/µL | 214 (112;326) |
| **Time on antiretroviral treatment**,months | 124.3 (45.5;184.8) |
| **Time on PIs**,months | 61 (21.1;144.6) |
| Time on LPV/RTV, months | 46.5 (21.3;76.1) |
| Time on ATZ/RTV, months | 13.25 (3.3;30) |
| Time on DRV/RTV, months | 21 (5.6;40.7) |
| **Time on TDF**,months | 55.4 (28;87.7) |
| **Patients on PIs,** n (%) | 40 (67.8%) |
| **Baseline suppressed viral load** | 56 (94.9%) |
| ***Change of treatment when TDF is discontinued***  **Only stop TDF,** n (%) | 24 (40.7%) |
| **Switch to ABC,** n (%) | 34 (57.6%) |
| **Discontinuation of the PI when TDF is discontinued,** n (%) | 0 |
| **Switch from TDF to another NRTI,** n (%) | 1 (1.7%) |
| **Arterial hypertension,** n (%) | 14 (23.7%) |
| **Diabetes,** n (%) | 8 (13.6%) |
| **Use of potentially nephrotoxic drugs** | 20 (32%) |

IQR, interquartile range; PI, protease inhibitor; LPV/RTV, lopinavir/ritonavir; ATZ/RTV, atazanavir/ritonavir; DRV/RTV, darunavir/ritonavir; TDF, tenofovir; ABC, abacavir; n, number of patients; NRTI, nucleotide reverse transcriptase inhibitor. Data are expressed as the median (IQR) unless otherwise indicated.
